# Supplementary material
Source: PubMed Central journal article supplement (PMC3416235)
Supplement: JB.00593-12_zjb999091712so1.pdf [file JB.00593-12_zjb999091712so1.pdf]

**Figure S1.** Denaturing and non-denaturing PAGE of purified CmtA. Lanes 1 and 2, denaturing PAGE of molecular mass standards (kDa) and 5  $\mu$ g CmtA stained with Coomassie G-250. Lane 3, non-denaturing gradient polyacrylamide gel of 10  $\mu$ g CmtA stained for methylcob(III)alamin:CoM methyltransferase activity.

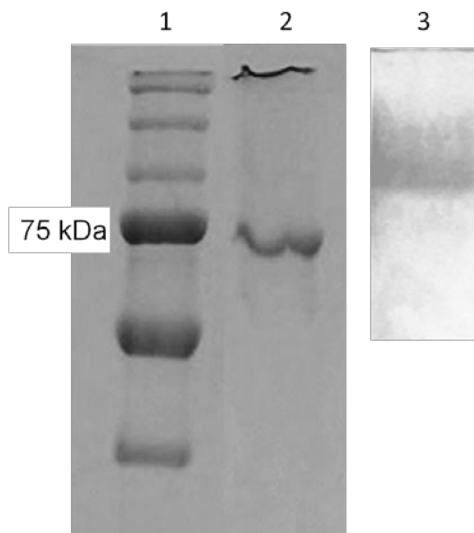

**Figure S2.** Comparison of sequences retrieved from a BLASP search queried with the deduced sequence of *M. acetivorans* MA4384. The retrieved sequences from *Methanohalobium evestigatum* (GENE ID: 9347354), *Methanohalophilus mahii* (GENE ID: 8983654) and *Methanosalsum zhilinae* (GENE ID: 10823438) are shown in panels A, B and C respectively. M.a. in each panel indicates the deduced sequence of MA4384 (GENE ID: 1476278).

**Panel A.**

|      |     |                                                                 |     |
|------|-----|-----------------------------------------------------------------|-----|
| M.a. | 2   | AKEDILNTLADAVVDGDDELAEEFAQKALDEE--LDAYEAIVDGLARGMKIISDMYERGE    | 59  |
|      |     | +KEDILN L +AV+ GD + A+E A K ++ +D YEAIVDGLA+GM I+SD YE GE       |     |
| M.e. | 6   | SKEDILNGLTNAVIQGDQDSAKELATKVIENGGVDPYEAIVDGLAKGMSIMSDKYENGE     | 65  |
| M.a. | 60  | AFVPSLLLAADAMYAGMDILTPYMKVDGTAAPKNV IIGTVEGDVHDIGKNLVKTMMTAAG   | 119 |
|      |     | FVP LL+A++AMYAGM LTPY+K D + VIIGTV+GDVHDIGKNLVKTM+TA+G          |     |
| M.e. | 66  | VFVPHLLVASNAMYAGMKELTPYIKTDEASKQAIV IIGTVQGDVHDIGKNLVKTMILTASG  | 125 |
| M.a. | 120 | FNMIDLGCDVPLDKFAETAKEKKA AISMSTLMTTTMGGMETVIEQLQEEGIRDSLIVMV    | 179 |
|      |     | FN IDLG DV LD+F E AKE KA AISMS LMTTTMGGMETVI++L+EEG+RDS+IVMV    |     |
| M.e. | 126 | FNAIDLGNVQLDEFVEKAKENKADAISMSALMTTTMGGMETVIDK LKEEGLRDSVIVMV    | 185 |
| M.a. | 180 | GGAPISQTFADSVGADGTALDASA AVETLTSLSVSEL-PSDS-WSDSAIAASKMKYKEVLA  | 237 |
|      |     | GGAP+S+ +A+ +GAD T DA +A + L V EL P++ WS+ I+ SK+KY+E LA         |     |
| M.e. | 186 | GGAPVSEDYANEIGADATLPDADSAADWLKDAVKELEPAERRWSEEKISTSKVKYREELA    | 245 |
| M.a. | 238 | QKSGKEKVDIGRITA EKIIAEFDSVVPKFNETMTKAERFGAAFQDKKVDRLPVAPLACGV   | 297 |
|      |     | +K+ E+VDIGR TA++II E +SV K E MT ER ++ DKKVDRLPV PLACGV          |     |
| M.e. | 246 | KKTVSEEV DIGRETAKEI IDEVESVGTGKKEEMTSIERVTSSLADKKVDRLPVYPLACGV  | 305 |
| M.a. | 298 | SRKFVPCSYVDYSTKA EKYADCVEAGIKYFNMDTFVGLTDL CVDAADFGATIRYPEEDTP  | 357 |
|      |     | +RKFVP +Y Y+ E +A AG KY + D FVGL DL + A D G I YPEEDTP           |     |
| M.e. | 306 | TRKFVPTTYKQY AIDPEMFAQSAYAGAKYLDYDMFVGLIDL SITAGDLGCEITYPEEDTP  | 365 |
| M.a. | 358 | AATGHLEDYEKLEVP ELKEGTRAYNLIQGNKLATEKAHALDAPMTALIEGPMVALTQIMG   | 417 |
|      |     | ++ GHLEDYE++EVPE+KEGTRAY L+Q KLA EK H + P+ EGP++ LTQ+MG         |     |
| M.e. | 366 | SSKGHLEDYEEIEVPEVKEGTRAYELVQATKLAKEKLHEIGKPVVGFHEGPLLTLTQLMG    | 425 |
| M.a. | 418 | ATRVLSDLRTNP DVVLKALDKTTVYVEEIMKGMFEEAQPDNLCMVNLW TNNVILSADEYM  | 477 |
|      |     | A RV+ D++TNP+VV A+DK YV + + FEE D LC+ NLW+NN I+S D+Y            |     |
| M.e. | 426 | ADRVMMMDKTNPEVVRDAVDKCADYVNLVTEKFF EEDACDALCIDNLWSNNKIMSEDDYW   | 485 |
| M.a. | 478 | KSEGQVMQNRIAPLYK KYNKPVVIHNCADAPHWEL-INKWNT EYYSYTFYPDEAGK GSKD | 536 |
|      |     | K +G+ + ++ PL+KKY++P +IH+CAD+ H++ I+K+ T+ +SY +YP+E +GSK+       |     |
| M.e. | 486 | KFDGKFIVDKHVPLFKKYDQPYMIHSCADSVHYDTQISKFGTDLFSYAYYPNEREQGSKN    | 545 |
| M.a. | 537 | HKYLINNYGKETMFGGEVSP I VFLDNSPEGLQKMKADTIALQESVLN TLKENGMSKYMI  | 596 |
|      |     | + LI YG E GEV PI F+DNS E + K+K+DT + LNTL ENG+QSKY++             |     |
| M.e. | 546 | YSDLIPKYGHECCMMGEVDPIQFMDNSSETIDKIKSDTDNVL TGALNTLNENGLQSKYVV   | 605 |
| M.a. | 597 | STGCEVPPGAPCDSITAQTYTVAEKGPELYKKIIG                             | 631 |
|      |     | STGCE+PPG + V EKGP L KK +G                                      |     |
| M.e. | 606 | STGCEIPPGGS LTGVKEMIDL VKEKGPGLQKKTMG                           | 640 |

**Panel B.**

|      |     |                                                                |     |
|------|-----|----------------------------------------------------------------|-----|
| M.a. | 4   | EDILNTLADAVVDGDDELAEEFAQKALDEELDAYEAIVDGLARGMKIISDMYERGEAFVP   | 63  |
|      |     | +DIL LA+AVV G+ +L E ++KAL E LD ++AI+DGLA+GM I+SD YE+G AFVP     |     |
| M.m. | 3   | QDILKELAEAVVSGNKDLTAEELSEKALKEGLDPHKAIIDGLAKGMVIVSDNYEKGTAFFVP | 62  |
| M.a. | 64  | SLLLAADAMYAGMDILTPYMKVDGTAAPKNVIGTVEGDVHDIGKNLVKTMMTAAGFNMI    | 123 |
|      |     | LL+A+ AMYAGMD+LTP+++ + ++ P ++IGTVEGDVHDIGKNLVKTM+A G + I      |     |
| M.m. | 63  | HLLIASQAMYAGMDVLTPHIETEESKPATMVIPTVEGDVHDIGKNLVKTMMSAGGIDTI    | 122 |
| M.a. | 124 | DLGCDVPLDKFAETAKEKAAAISMSTLMTTMMGGMETVIEQLQEEGIRDSLIVMVGAP     | 183 |
|      |     | DLG DVPLDKF ETA+E +A ISMS LMTTMM GME VIE LQEEG+RDSLIVMVGAP     |     |
| M.m. | 123 | DLGNDVPLDKFIETARENQADVISMSALMTTMMSGMEKVIEMLQEEGLRDSLIVMVGAP    | 182 |
| M.a. | 184 | ISQTFADSVGADGTALDASA AVETLTSLSVSEL-PS-DSWSDSAIAASKMKYKEVLAQKSG | 241 |
|      |     | IS+ FA+++GAD TA DA A VS+L PS + WSD I +K+KY+E+LA+K              |     |
| M.m. | 183 | ISEDFAENIGADKTAPDALHASNWAIDAVSKLSPSKERWSDEKINLAKVKYREILAKKQV   | 242 |
| M.a. | 242 | KEKVDIGRITAEEKIIAEFDSVVPKFNETMTKAERFGAAFQDKKVDRLPVAPLACGVSRLF  | 301 |
|      |     | K K DIGR TA++I+ EF+SV K E M+ A+R AA DKKVDRLPV PLACG RKF        |     |
| M.m. | 243 | KSKKDIGRETAKQIMEEFESVGVKSKEEMSHADRTLAAMADKKVDRLPVYPLACGALRKF   | 302 |
| M.a. | 302 | VPCSYVDYSTKAKEYADCVEAGIKYFNMDTFVGLTDLCDVAADFGATIRYPEEDTPAATG   | 361 |
|      |     | +Y +Y+ K+A+ G KY ++D FVGL DL +ADFG TI+YPEEDTP++ G              |     |
| M.m. | 303 | ADATYKEYAIDPNKFAESAFGLCKYMDLDMFVGLIDLATSADFGCTIKYPEEDTPSSEG    | 362 |
| M.a. | 362 | HLEDYEKLEVPPELKEGTRAYNLIQGNKLATEKAHA-LDAPMTALIEGPMVALTQIMGATR  | 420 |
|      |     | HLEDYE +E PE+KEGTRAY LI+ +KLA +K + L P EGP++ LTQ+MGA R         |     |
| M.m. | 363 | HLEDYEDIETPEVKEGTRAYELIEASKLAKDKLNKELGTPFVGFHEGPLLTLTQLMGADR   | 422 |
| M.a. | 421 | VLSDLRTNPDVVLKALDKTTVYVEEIMKGMFEEAQPNDLQCMVNLWNTNNVILSADEYMKSE | 480 |
|      |     | VL D++TNPDVVL+AL K T YV ++ + FEE D LC+ NLW+NN+I+ ++Y K +       |     |
| M.m. | 423 | VLMDMKTNPDVVLEALQKCTDYVCQVSEAFFEEDACDALCVDNLWSNNIIMDEEDYWKFD   | 482 |
| M.a. | 481 | GQVMQNRRIAPLYKKYNKPVVHNCADAPHWEL-INKWNTTEYYSYTFYPDEAGKSKDHKY   | 539 |
|      |     | G+ + ++ P++KKY++P +IHNCADA H++ I K+ T +SY +Y E KGS+++          |     |
| M.m. | 483 | GKFVYDQHIPPVFKKYDQPYIHHNCADAVHFDTQIKKFGTALFSYAYYESEREKGSQNYAD  | 542 |
| M.a. | 540 | LINNYGKETMFGGEVSPIVFLDNSPEGLQKMKADTIALQESVLNTLKENGMQSKYMISTG   | 599 |
|      |     | LI YG GE++PI +DNSPEG+QK++ DT L + V +LKENGMQSKY++STG            |     |
| M.m. | 543 | LIPKYGDMCCMMGEINPIDMMDNSPEGIQKIENDTEVLLKGVHESLKENGMQSKYVMSTG   | 602 |
| M.a. | 600 | CEVPPGAPCDSITAQTYTVAEKGPPELYKKIIG                              | 631 |
|      |     | CE PPG P I A V E GP+ K IIG                                     |     |
| M.m. | 603 | CETPPGGPMTPIKAMVDKVKELGPPQFQKDIIG                              | 634 |

**Panel C.**

|      |     |                                                                |     |
|------|-----|----------------------------------------------------------------|-----|
| M.a. | 3   | KEDILNTLADAVVDGDELAEFFAQKALDEELDAYEAIVDGLARGMKIISDMYERGEAFV    | 62  |
|      |     | KE+ILN LADAVV G E A E ++KAL+E +D EA+V+GLA+GM I+SD YE GEAFV     |     |
| M.z. | 2   | KEEILNQLADAVVSGSKESAELSCKKALEEGIDPQEALVNLAKGMNIMSDKYETGEAFV    | 61  |
| M.a. | 63  | PSLLLLAADAMYAGMDILTPYMKVDGTAAPKNVIIIGTVEGDVHDIGKNLVKTMMTAAGFNM | 122 |
|      |     | P LL+A+ AMYAGM++L P++K +G P +IGT+EGDVHDIGKNLVKTM++AAGFNM       |     |
| M.z. | 62  | PHLLIASGAMYAGMEVLIPHLKKEGAGR PATGVIGTIEGDVHDIGKNLVKTMLSAAGFNM  | 121 |
| M.a. | 123 | IDLGCDVPLDKFAETAKEKKAASMSLMTTTTMMGGMETVIEQLQEEGIRDSLIVMVGGA    | 182 |
|      |     | IDLG DVPL+ F + AKE KA ISMS LMTTTM GME VIE LQEEGIRD++ VMVGGA    |     |
| M.z. | 122 | IDLGNVPLEDFVKAACKENKADIIISMSALMTTTMVGMEKVIESLQEEGIRDAVKVMVGGA  | 181 |
| M.a. | 183 | PISQTFADSVGADGTALDASA AVETLTSLVSELP--SDSWSDSAIAASKMKYKEVL--AQ  | 238 |
|      |     | P+S+ FA+ +GAD T D+ A + T+ V +P + W++ I+ K+KY++VL +             |     |
| M.z. | 182 | PVSEEF AEKIGADSTHPDSMGAADWATNAVKSMPPADERWTEEKISLGKVKYRDVLAKKK  | 241 |
| M.a. | 239 | KSGKEKVDIGRITAEKIIAEFDSVVPKFNEMTKAERFGAAFQDKKVDRLPVAPLACGVS    | 298 |
|      |     | DIG TA +II EF+ V K E MT +R ++ DKKVDRLPV PLACGV                 |     |
| M.z. | 242 | AKVGAAKDIGLETAREIIDEFEKVGKKEEMTHIDRVVSSLGDKKVDRLPVYPLACGVL     | 301 |
| M.a. | 299 | RKFVPCSYVDYSTKAEKYADCVEAGIKYFNMDTFVGLTDL CVDAADFGATIRYPEEDTPA  | 358 |
|      |     | RKFVP +Y +Y+T E +A G+KY ++D FVGL DL + ++D G + P+EDTPA          |     |
| M.z. | 302 | RKFVPTTYREYTTDPEMFAQSAYLGVKYMDLDMFVGLVDLSITSSDLGCKVSIPEDETPA   | 361 |
| M.a. | 359 | ATGHLEDYEKLEVPPELKEGTRAYNLIQGNKLATEKAHA-LDAPMTALIEGPMVALTQIMG  | 417 |
|      |     | + GHL+DY+K+E+PE+KEGTR Y LIQ +KLA E+ + L+AP A EGP++ LTQ+MG      |     |
| M.z. | 362 | SVGHLLDDYDKIEIPEVKEGTR IYELIQASKLAKERLNKELNAPFVAFHEGPLLTLTQLMG | 421 |
| M.a. | 418 | ATRVLSDLRTNPDVVLKALDKTTVYVEEIMKGMFEEAQP DNLCMVNLWNTNNVILSADEYM | 477 |
|      |     | A RVL D++TNPDVVL A+DK T +V +I + FEE D LC+ NLW+NNVI+S D+Y       |     |
| M.z. | 422 | ADRVLMDMKTNPDVVLDAVDKMTDFVCDISEKFFEEADCDGLCIDNLWSNNVIMSEDDYW   | 481 |
| M.a. | 478 | KSEGQVMQNRIAPLYKKYNKPVVIHNCADAPHWEL-INKWNT EYYSYTFYPDEAGKSKD   | 536 |
|      |     | K EG+ +++R PL+K+YN+P +IH+CAD H+++ I ++ T +SY +YP KGSK+         |     |
| M.z. | 482 | KFEGKFVKDRHVPLFKEYNQPYMIHSCADNVHFDIQIKEFGTGLFSYAYYPKLRNKGSKN   | 541 |
| M.a. | 537 | HKYLINNYGKETMFGGEVSPIVFLDNSPEGLQKMKADTIALQESVLNTLKENGMQSKYMI   | 596 |
|      |     | + LI YG GEV PI F+D SPEG+Q ++ DT L VL LKENG+QSKY++              |     |
| M.z. | 542 | YADLIPKYGDMCCMMGEVDP IKFIDPSPEGVQSIENDTEELLRGVLPVLKENGLQSKYVM  | 601 |
| M.a. | 597 | STGCEVPPGAPCDSITAQTYTVAEKGP ELYKKIIG                           | 631 |
|      |     | STGCE+PPG P + + A TV + GP+L K+I+G                              |     |
| M.z. | 602 | STGCEIIPGGPLNGVKAMVDTVKKG PDLQKEIMG                            | 636 |

**Figure S3.** Comparison of the deduced sequence of MA4384 from *M. acetivorans* with sequences of subunits from the DMS:HS-CoM methyltransferase of *M. barkeri*. Panel A, MA4384 (GENE ID: 1476278) versus MtaA (GENE ID: 73671018); Panel B, MA4384 versus MtaB (GENE ID: 73671018).

**Panel A.**

```

MtsA      5  MTPTRRVMAAVLGGRVDYVPPANPLAQTTELMOICNASWPKAHFDSKMMADLAAAPYEV  64
      MT  R  AA  +VD +P A PLA  +  C  S+  ++  AD  A  +
MA4384  270  MTKAERFGAAFQDKKVDRLPVA-PLACGVSRKFVPC--SYVDYSTKAEKYADCVEAGIKY  326

MtsA      65  CGIEAARPQFDISLEAEVLGCKLDWDKPDPRPPVIGPAYTDPSNVTWPDNLEEAGRIPVVL  124
      ++  D+ ++A  G  +  +  +  D  P  G  D  +  P+ L+E  R  ++
MA4384  327  FNMDTFVGLTDLCVDAADFGATIRYPEEDTPAATGH-LEDYEKLEVPE-LKEGTRAYNLI  384

MtsA      125  GAIEELRTRYDGM--PVIPLLTSPFTIASHIAGVENMAKWTKTAPEKAHAFIEAATDFV  182
      +L T  L  P+  L+  P  +  I  G  +  +T P+  ++  T +V
MA4384  385  QG-NKLATEKAHALDAPMTALIEGPMVALTQIMGATRVLSDLRTNPDVVLKALDKTTVYV  443

MtsA      183  --IAYGKLQ-----TIYGAHIVFLADPSASGDLISAETYREFVLPAHKRIAKEIS  230
      I  G  +  ++  +++  AD  +  +  +  +  P +K+  K
MA4384  444  EEIMKGMFEEAQPDNLCMVNLWTNNVILSADEYMKSE---GQVMQNRIAPLYKKYK---  497

      *  *
MtsA      231  CPQILHICGDTSKLLPYIKQSGIDCFSFDAVP-----VSYCRQVVGNEMSILGSLD  281
      P ++H C D  I  +  + +S+  P  Y  G  E  G  +
MA4384  498  -PVVIHNCADAPH-WELINKWNTTEYYSYTFYPDEAGKGSKDHKYLINNYGKETMFGGEVS  555

      *
MtsA      282  VIDLMPN-----GTPEQVYNRTRECILQGADIVGTS*CGLSFGTSLLENLRAYV  328
      I  +  N  E  V  N  +E  +Q  ++  T  C  +  G  +++  A
MA4384  556  PIVFLDNSPEGLQMKKADTIALQESVLNLTLENGMQSKYMISTG*CEVPPGAPCDSITAQT  615

MtsA      329  RACKE  333
      E
MA4384  616  YTVAE  620

```

**Panel B.**

```

MtsB      66  IAEAVITGNRAETVKLTTALLAEGRDPTDLVLNALMPGIHTVCELYDIGESYVPEILLAN  125
      +A+AV+ G+  +  L  E  D  +  +++  L  G+  +  ++Y+  GE++VP  +LLA
MA4384  10  LADAVVDGDDELAEFEAQKALDEELDAYEAIVDGLARGMKIISDMYERGEAFVPSLLLAA  69

MtsB      126  EALIGGVGLCQE--RIGEVPYQGKVVSLVIEGDVHDIGKNIVVAILRANGFEVDMGSDV  183
      +A+  G+  +  ++  V+  +EGDVHDIGKN+V  ++  A  GF  ++D+G  DV
MA4384  70  DAMYAGMDILTPYMKVDGTAAPKNV IIGTVEGDVHDIGKNLVKTMMTAAGFNMIDLGCDV  129

MtsB      184  TVEEAVKAVKATNADLVTGTTLMSTTKGGIKDLAEILYSEDVP----VACGGAAIDRNFV  239
      +++  +  K  A  ++  +TLM+TT  GG++  +  E  L  E  +  V  GGA  I  +  F
MA4384  130  PLDKFAETAKEKAAAISMSTLMTTMMGGMETVIEQLQEEGIRDSLIVMVGGA PISQTF  189

MtsB      240  ET  241
      ++
MA4384  190  DS  191

```
